# Supplementary material for: Effect of salt on the lamellar Lα-to-MLV transformation in SDS/octanol/water under microfluidic flow
Source: Royal Society of Chemistry journal article supplement (doi:10.1039/d2sm00643j), 2022-01-01
Supplement: d2sm00643j1.pdf [file d2sm00643j1.pdf]

Supporting Information:  
Effect of salt on the lamellar  $L_{\alpha}$ -to-MLV transformation in  
SDS/octanol/water under microfluidic flow

Liva Donina, Lionel Porcar, and João T. Cabral\*

July 6, 2022

1 Optical birefringence estimates of the phase boundaries of the SDS/octanol/brine system with varying NaCl content.

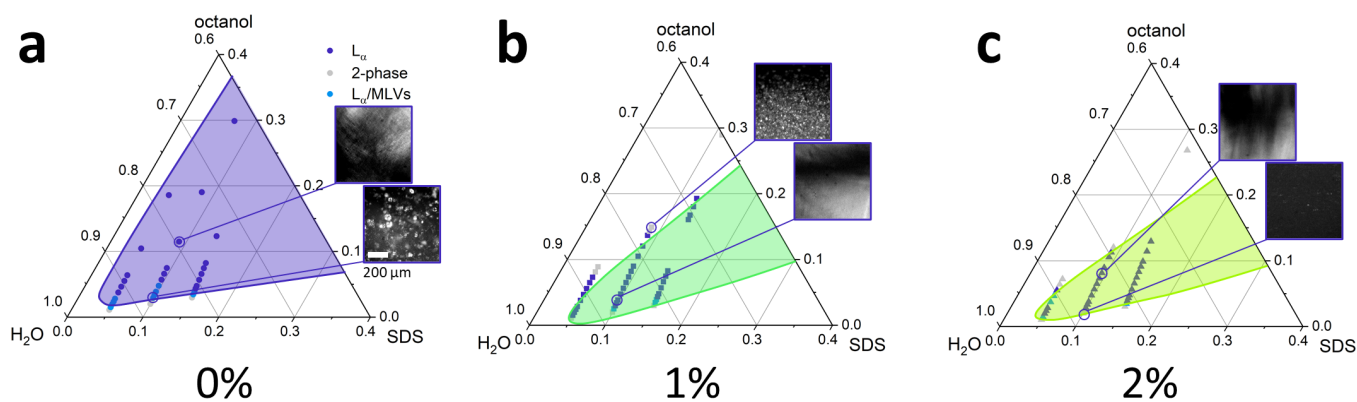

Figure S1: Phase maps of SDS/octanol/water system with different salt concentrations. a) 0% NaCl; b) 1% NaCl; c) 2% NaCl.

## 2 Viscosity measurements for SDS/octanol/brine with varying NaCl content.

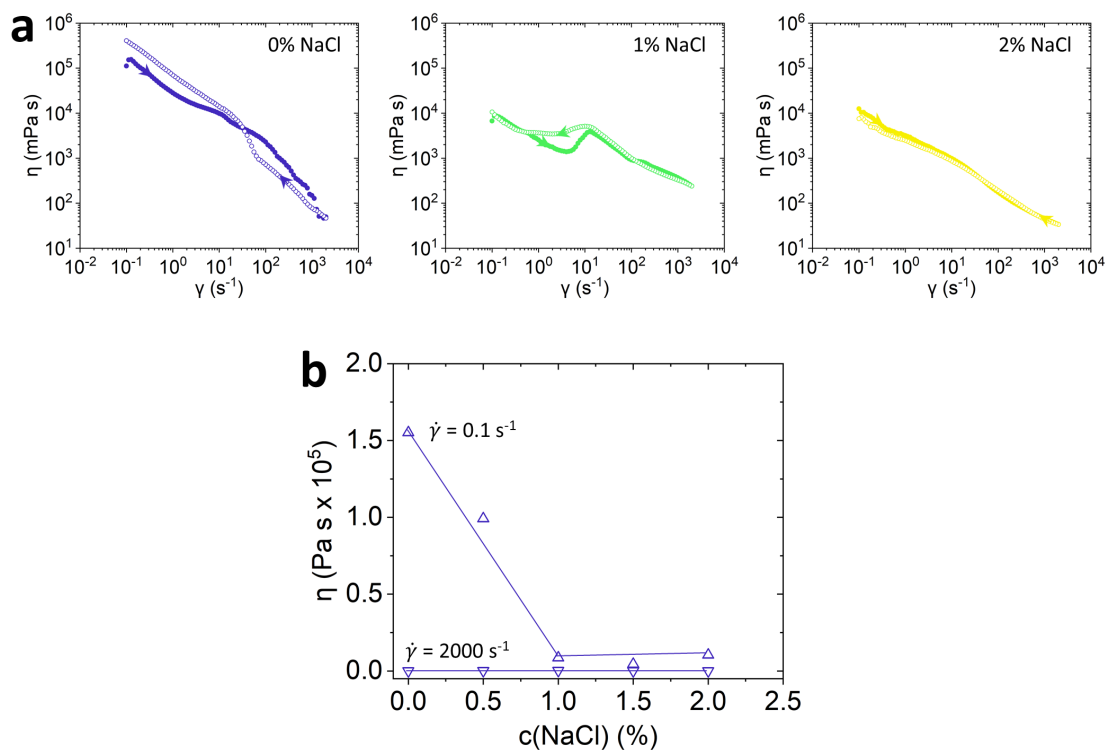

Figure S2: **Rheological characterisation of SDS/octanol/water system with different salt concentrations.** a) Rheological shear sweeps from 0.1 to 2000 s<sup>-1</sup> for selected salt concentrations for 0%, 1% and 2% NaCl; b) Viscosity  $\eta$  dependence on NaCl concentrations.

### 3 Microfluidic experimental design, PIV and pressure drop estimates.

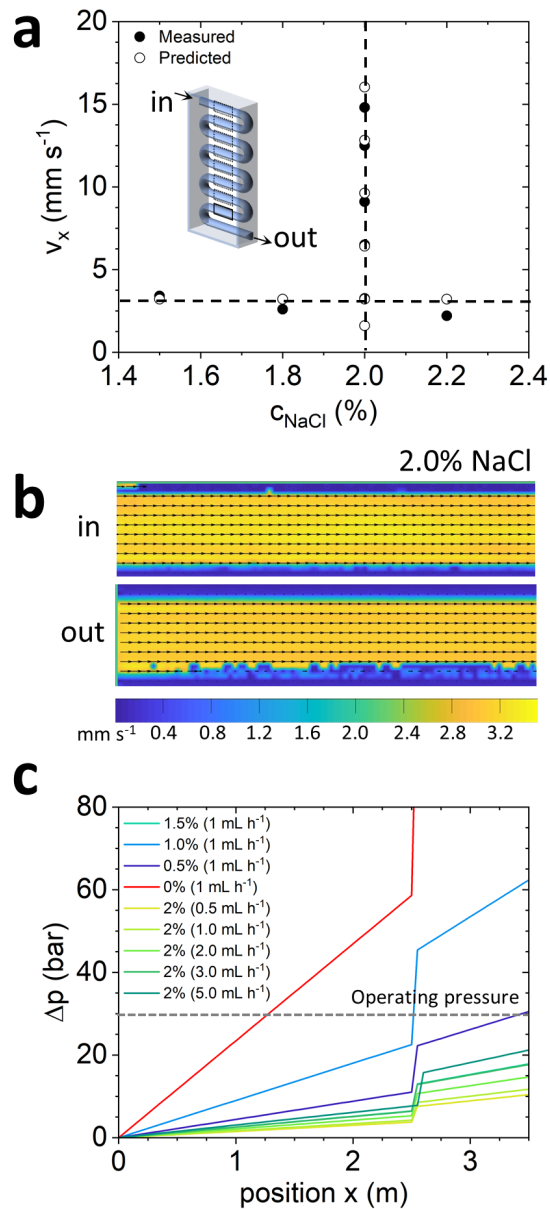

Figure S3: **Overview of flow conditions.** a) Imposed vs measured flow rate  $v_x$ ; b) PIV of 2.0% NaCl condition at the start and end of the chip showing plug-like flow profile. PIVs were obtained using PIVLab software inputting 20 consecutive images and ensemble correlation with 2 passes with 64x64 and 32x32 pixel by pixel interrogation window sizes (1 pixel = 1.54  $\mu\text{m}$ ), and selecting a Gauss 2x3-point sub-pixel estimator and 'standard' correlation quality; c) Pressure drop calculations along the microfluidic chip for various flow and NaCl conditions estimated using Hagen–Poiseuille equation. A maximum safe operating pressure for this microfluidic system is estimated to be 30 bar.

#### 4 SANS contrasts, tabulated fitted values, parameter sensitivity, and compressibility modulus estimates.

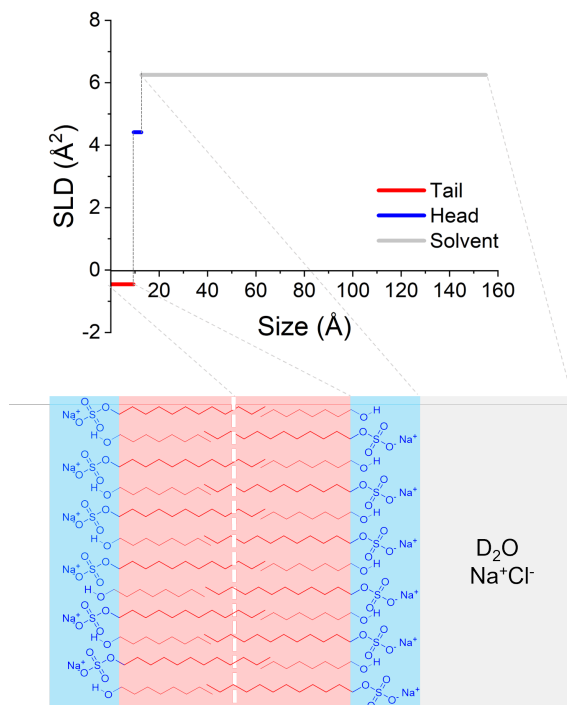

Figure S4: Scattering length density (SLD) estimates and schematic of the bilayer cross-section.

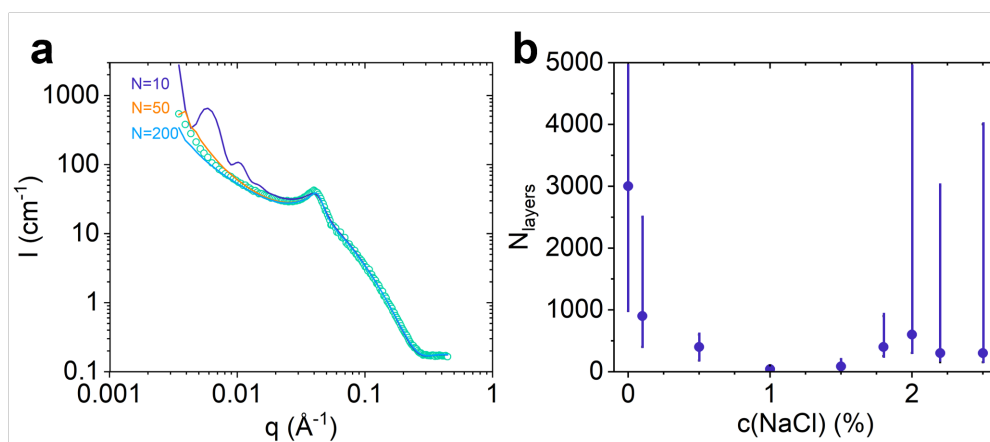

Figure S5: **Model estimate for number of layers** a) Model fit with varying number of  $L_\alpha$  layers  $N=10, 50, 200$  for 1.5% NaCl; b) Estimated number of layers  $N$  for varying NaCl concentrations

| c(NaCl)<br>% | scale | l(incoh)<br>cm <sup>-1</sup> | l(tail)<br>Å | l(head)<br>Å | δ<br>Å | N layers  | d<br>Å     | η | SLD (tail)<br>10 <sup>-6</sup> /Å <sup>2</sup> | SLD (head)<br>10 <sup>-6</sup> /Å <sup>2</sup> | SLD (solvent)<br>10 <sup>-6</sup> /Å <sup>2</sup> | polydis | χ <sup>2</sup> |     |
|--------------|-------|------------------------------|--------------|--------------|--------|-----------|------------|---|------------------------------------------------|------------------------------------------------|---------------------------------------------------|---------|----------------|-----|
| 0            | 0.9   | 0.17                         | 9.4          | 3.2          | 25.2   | 980-10000 | 1560.11039 |   | -0.46                                          | 4.41                                           |                                                   | 6       | 0              | 359 |
| 0.1          | 0.9   | 0.18                         | 9.4          | 3.2          | 24.8   | 400-2500  | 1560.23816 |   | -0.46                                          | 4.41                                           |                                                   | 6       | 0              | 168 |
| 0.5          | 0.9   | 0.18                         | 9.4          | 3.2          | 24.0   | 180-600   | 1440.77126 |   | -0.46                                          | 4.41                                           |                                                   | 6       | 0              | 74  |
| 1            | 0.6   | 0.16                         | 9.4          | 3.2          | 26.0   | 37-100    | 1350.99991 |   | -0.46                                          | 4.41                                           |                                                   | 6       | 0.07           | 370 |
| 1.5          | 0.63  | 0.17                         | 9.4          | 3.2          | 25.5   | 50-200    | 1470.99997 |   | -0.46                                          | 4.41                                           |                                                   | 6       | 0.06           | 22  |
| 1.8          | 0.7   | 0.16                         | 9.4          | 3.2          | 24.7   | 250-900   | 150.99999  |   | -0.46                                          | 4.41                                           |                                                   | 6       | 0.08           | 18  |
| 2            | 0.7   | 0.16                         | 9.4          | 3.2          | 25.0   | 200-600   | 1560.99995 |   | -0.46                                          | 4.41                                           |                                                   | 5.8     | 0.08           | 57  |
| 2.2          | 0.7   | 0.17                         | 9.4          | 3.2          | 24.9   | 150-3000  | 1520.99996 |   | -0.46                                          | 4.41                                           |                                                   | 5.9     | 0.1            | 45  |
| 2.5          | 0.5   | 0.17                         | 9.4          | 3.2          | 27.3   | 150-3000  | 149.99999  |   | -0.46                                          | 4.41                                           |                                                   | 6       | 0.09           | 63  |

Figure S6: Fitted SANS parameters corresponding to Figs. 4 and 5 of the main paper.

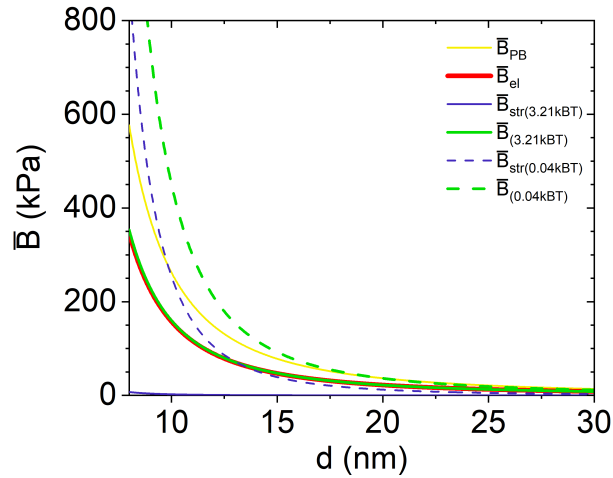

Figure S7: **Membrane compressibility modulus  $\bar{B}$  dependence on d-spacing  $d$ .**  $\bar{B}_{el}$  (red solid line), value adjusted when accounting for spatial correlation of counterions adjacent to membrane and  $\bar{B}_{str}$  are summed to obtain  $\bar{B}$  values for low and high membrane bending rigidity conditions shown in dashed and solid green colours respectively.  $\bar{B}_{PB}$  is the value of membrane compressibility modulus only considering electrostatic contributions without counterion interactions.

## 5 Extended dataset for SANS results for 2% NaCl under varying flow rate conditions.

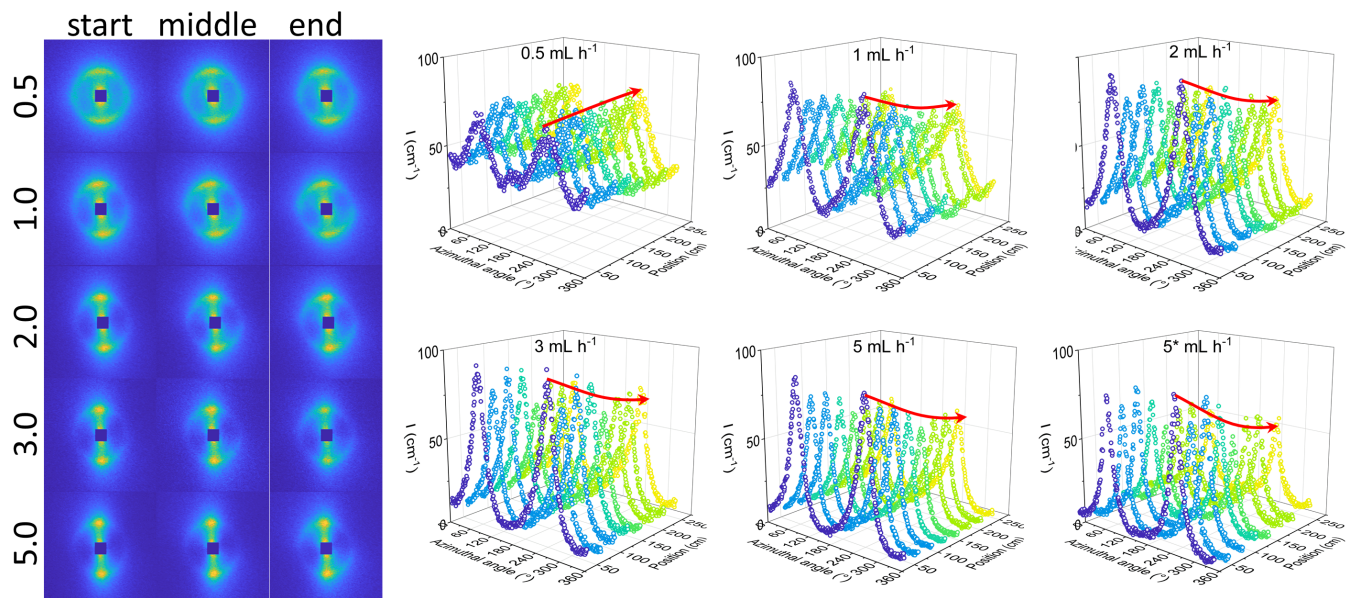

Figure S8: **2D SANS patterns** acquired at three representative channel positions (15, 130 and 245 cm, termed 'start', 'middle', 'end') at selected flow rates 0.5, 1.0, 2.0, 3.0 and 5.0 mL h<sup>-1</sup> indicated. Azimuthal profile evolution along the channel at the respective 5 distinct flow rates, as well after cessation of flow at 5.0 mL h<sup>-1</sup>, indicated as 5\* mL h<sup>-1</sup>. A subset of these data is presented in Fig. 8c of the main paper.

## 6 Comparison between serpentine microchannel flow experiments at 2% NaCl and previous oscillatory microflow data [1].

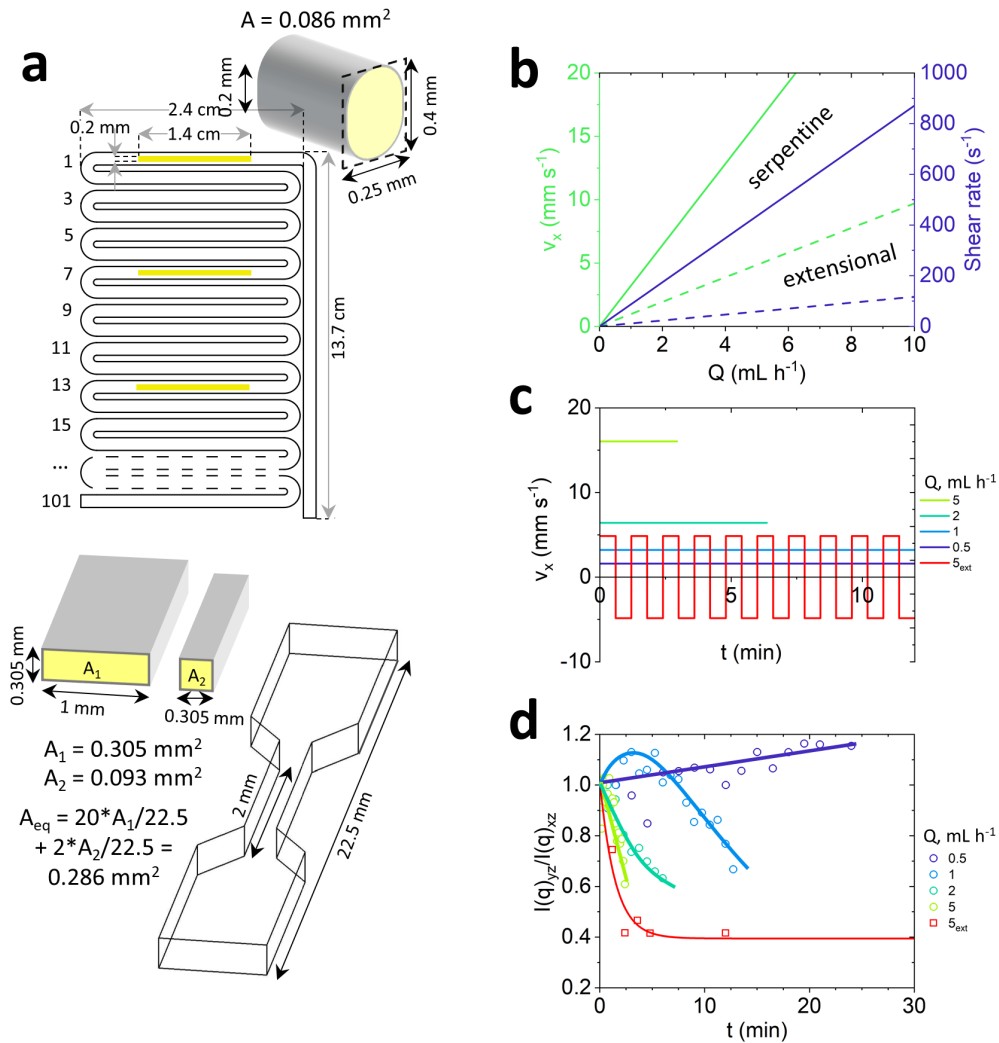

Figure S9: **Comparison of the flow effects induced by serpentine and extensional/oscillatory microfluidic chip geometries.** a) Microdevice geometry and channel cross-sections, including cross-sectional areas; b) Average linear velocity  $v_x$  and wall shear rate estimates as a function of volumetric flow rates; c) Imposed average flow velocity as the corresponding volumetric flow rates: horizontal lines correspond to the serpentine channel (0.5, 1.0, 2.0 and 5.0 mL h<sup>-1</sup>), while the square wave indicates the velocity (wide cross-section) within the extensional/oscillatory field at 5 mL h<sup>-1</sup>; d) Normalised  $l(q)_{yz}/l(q)_{xz}$  evolution comparison between extensional geometry at 5 mL h<sup>-1</sup> and linear serpentine geometry at 0.5, 1.0, 2.0 and 5.0 mL h<sup>-1</sup>.

### References

[1] L. Donina, A. Rafique, S. Khodaparast, L. Porcar, and J. T. Cabral, *Soft Matter* 2021, **17**, 44, 10053–10062.
